# Supplementary figures and images for: State gun laws, gun ownership, and mass shootings in the US: cross sectional time series
Source: HighWire-hosted journal article supplement (doi:10.1136/bmj.l542), 2019-03-06

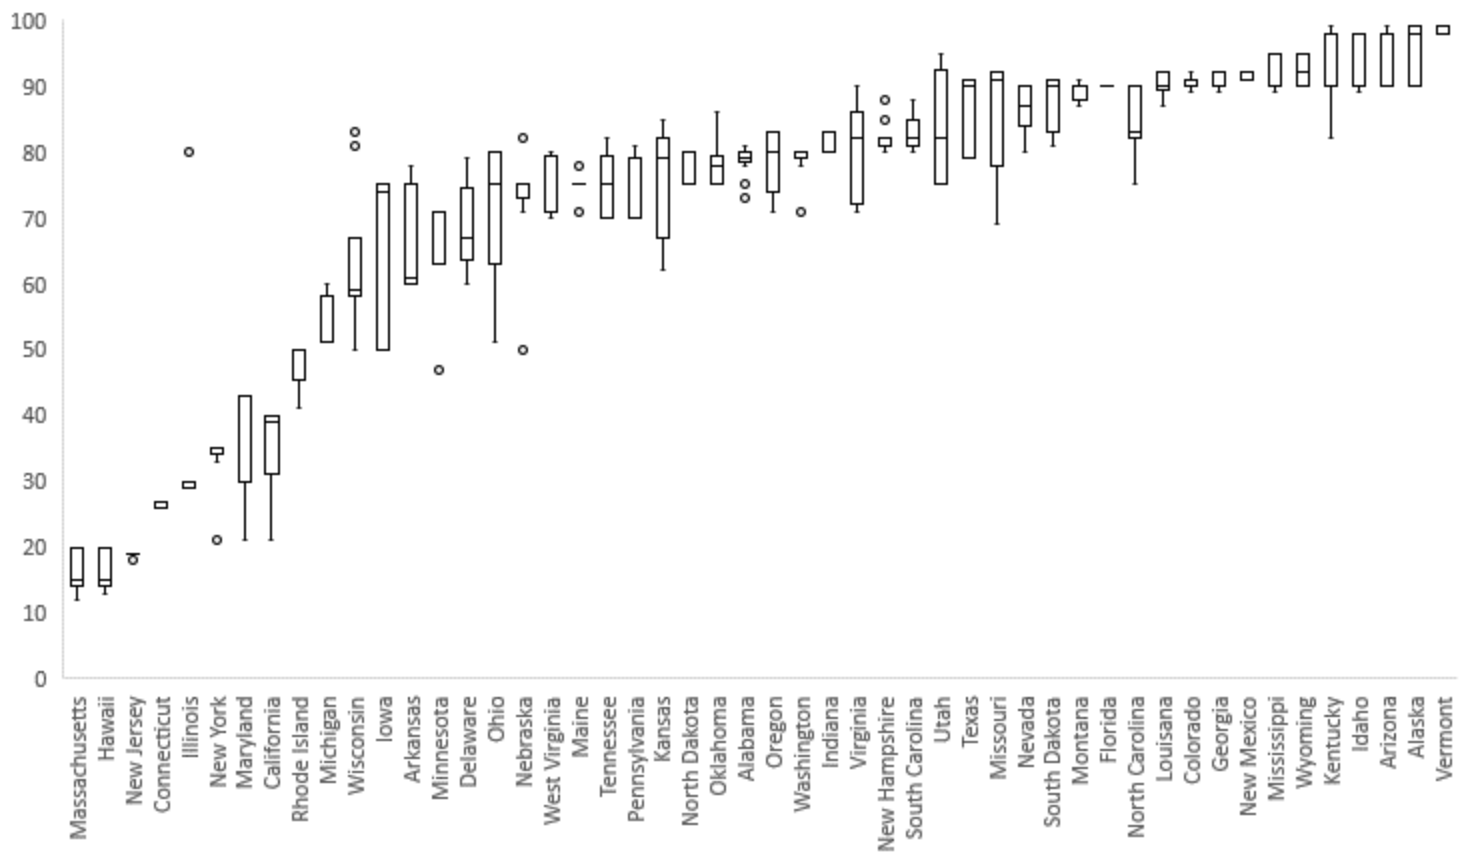

**Appendix Figure 1:** Boxplot of restrictiveness-permissiveness scores per state, 1998-2015

Supplement: reep045175.ww1.pdf [file reep045175.ww1.pdf]
